# Supplementary material for: Advanced Glycation End Products (AGE) and Soluble Forms of AGE Receptor: Emerging Role as Mortality Risk Factors in CKD
Source: PubMed Central journal article supplement (PMC7767383; doi:10.3390/biomedicines8120638), 2020-12-21
Supplement: biomedicines-08-00638-s001.pdf [file biomedicines-08-00638-s001.pdf]

# Supplementary Table

Table S1. Association with all-cause mortality at multivariable Cox proportional hazard regression adjusted for age, MIS (malnutrition inflammatory score) and dialysis status.

|                                 | Variable |          | Age   |          | MIS   |          | Dialysis |          |
|---------------------------------|----------|----------|-------|----------|-------|----------|----------|----------|
|                                 | HR       | <i>p</i> | HR    | <i>p</i> | HR    | <i>p</i> | HR       | <i>p</i> |
| <b>esRAGE</b>                   | 1.001    | 0.044    | 1.102 | 0.006    | 1.039 | 0.244    | 1.795    | 0.285    |
| <b>cRAGE/esRAGE</b>             | 0.621    | 0.052    | 1.096 | 0.01     | 1.055 | 0.083    | 2.011    | 0.168    |
| <b>AGEs</b>                     | 1        | 0.11     | 1.09  | 0.011    | 1.065 | 0.049    | 1.651    | 0.351    |
| <b>AGEs/<br/>Total proteins</b> | 1.002    | 0.289    | 1.085 | 0.015    | 1.062 | 0.065    | 1.72     | 0.353    |
| <b>sRAGE</b>                    | 1        | 0.372    | 1.093 | 0.008    | 1.046 | 0.205    | 2.235    | 0.11     |
| <b>cRAGE</b>                    | 1        | 0.863    | 1.091 | 0.009    | 1.059 | 0.097    | 2.403    | 0.076    |
| <b>GA</b>                       | 0.925    | 0.074    | 1.101 | 0.008    | 1.089 | 0.019    | 0.925    | 0.085    |

The hazard ratios are reported resulting from a multivariable model adjusted for age, MIS (malnutrition inflammatory score) and dialysis status. AGEs, advanced glycation end products; cRAGE, cleaved receptor for advanced glycation end products; esRAGE, endogenous secretory receptor for advanced glycation end products; GA, glycated albumin.
